# Supplementary material for: A highly stable dimethyl-functionalized Ce(iv)-based UiO-66 metal–organic framework material for gas sorption and redox catalysis
Source: Royal Society of Chemistry journal article supplement (doi:10.1039/c6ce01704e), 2016-01-01
Supplement: c6ce01704e1.pdf [file c6ce01704e1.pdf]

Electronic Supplementary Information for CrystEngComm  
This journal is © The Royal Society of Chemistry 2016

### Supporting Information For

**A highly stable dimethyl-functionalized Ce(IV)-based UiO-66 metal-organic  
framework material for gas sorption and redox catalysis**

*Rana Dalapati, Balasubramanian Sakthivel, Amarajothi Dhakshinamoorthy, \* Amlan  
Buragohain, Asamanjoy Bhunia, Christoph Janiak, and Shyam Biswas\**

\* To whom correspondence should be addressed.

E-mail: sbiswas@iitg.ernet.in. Tel: (+)91-3612583309. Fax: (+)91-3612582349.

E-mail: admguru@gmail.com

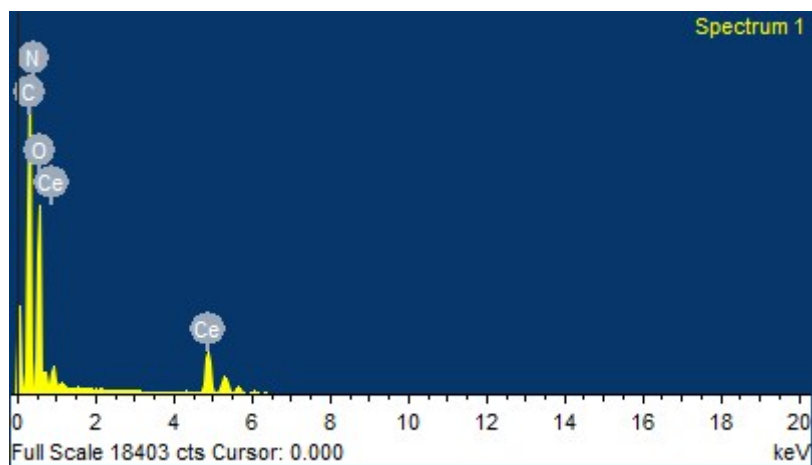

**Figure S1.** EDX spectrum of **1'**.

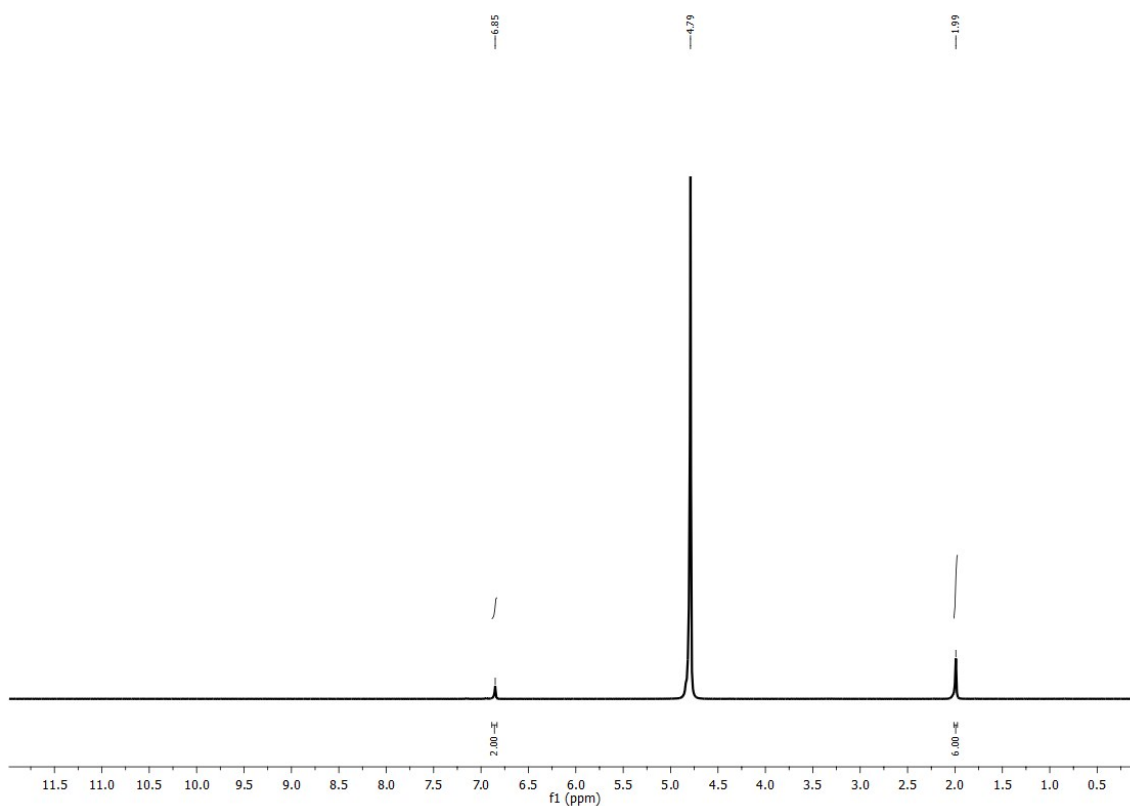

**Figure S2.**  $^1\text{H}$ -NMR spectra of  $\text{H}_2\text{BDC}-(\text{CH}_3)_2$  ligand recorded in 500  $\mu\text{L}$  of 1M NaOH in  $\text{D}_2\text{O}$ . The peaks at  $\delta$  values of 6.85 and 1.99 ppm correspond to the ligand. The peak at  $\delta$  value of 4.79 ppm correspond to HDO (NMR solvent).

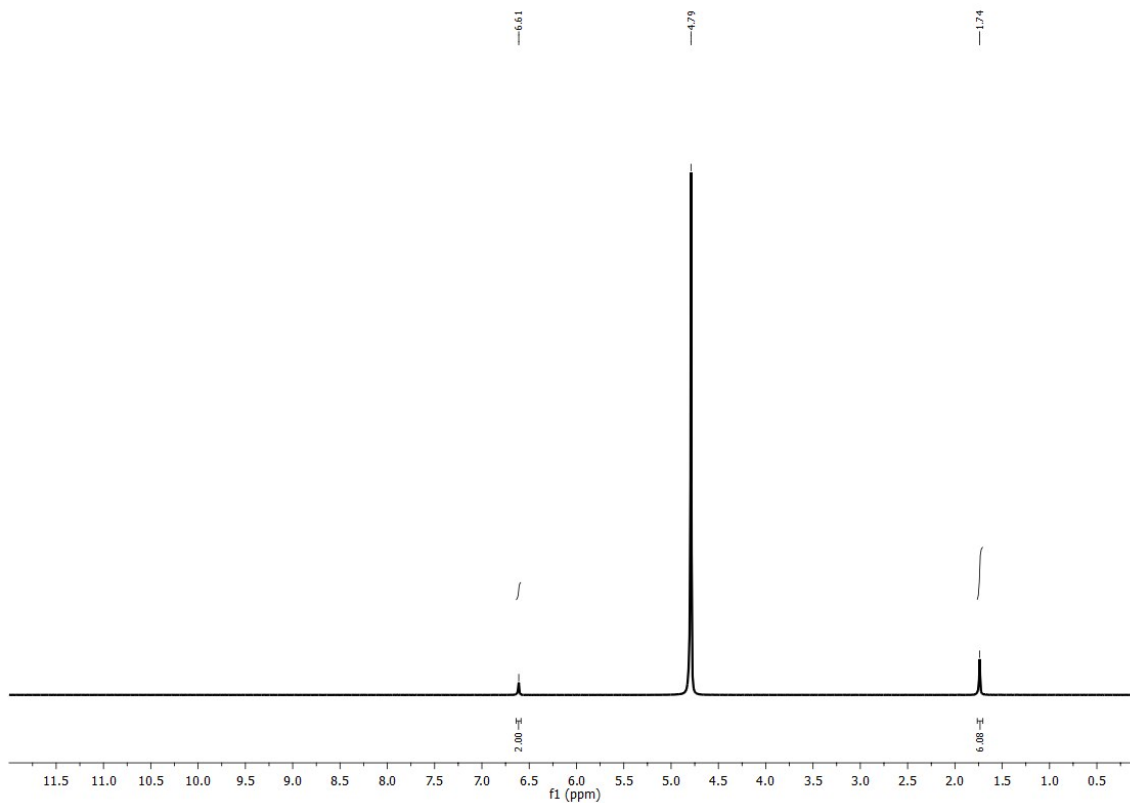

**Figure S3.**  $^1\text{H}$ -NMR spectra of **1'** recorded in 500  $\mu\text{L}$  of 1M NaOH in  $\text{D}_2\text{O}$ . The peaks at  $\delta$  values of 6.61 and 1.74 ppm correspond to the ligand. The peak at  $\delta$  value of 4.79 ppm correspond to HDO (NMR solvent).

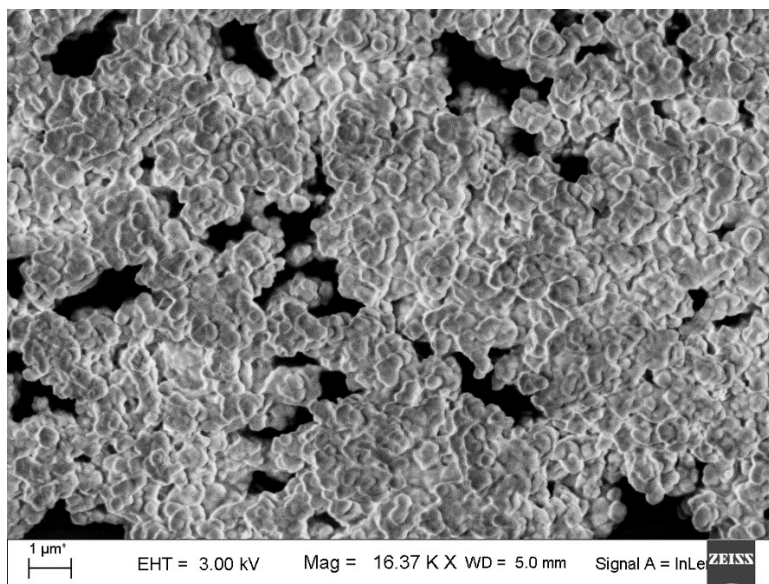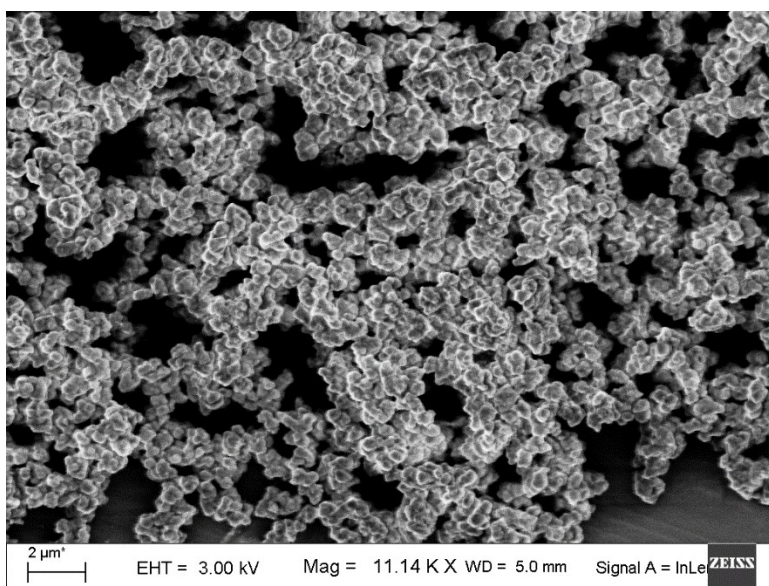

**Figure S4.** FE-SEM images of as-synthesized **1'**.

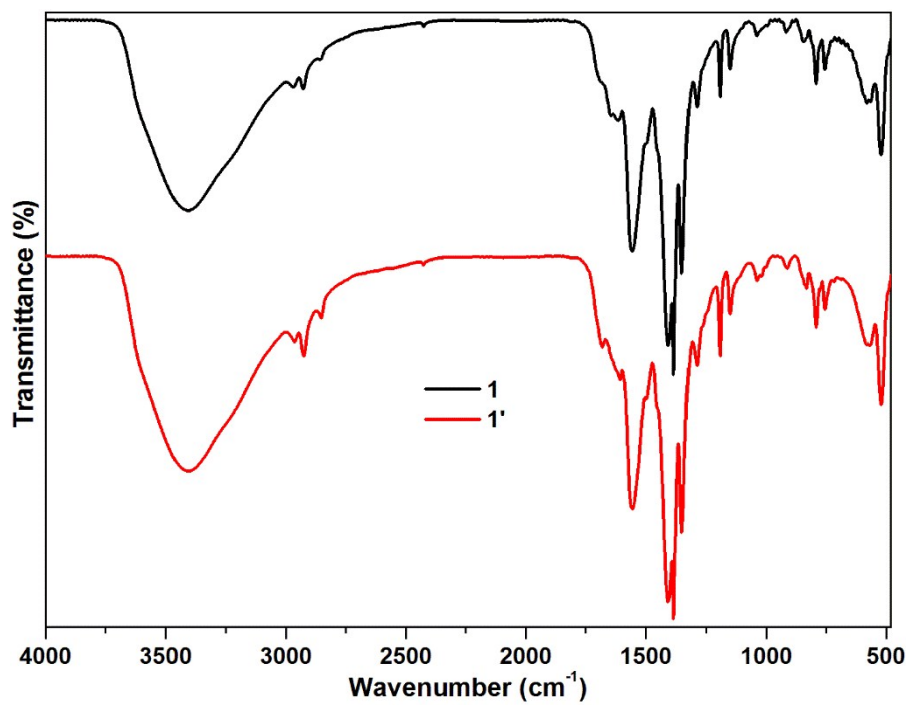

Figure S5. FT-IR spectra of as-synthesized **1** (black) and activated (red) **1'**.

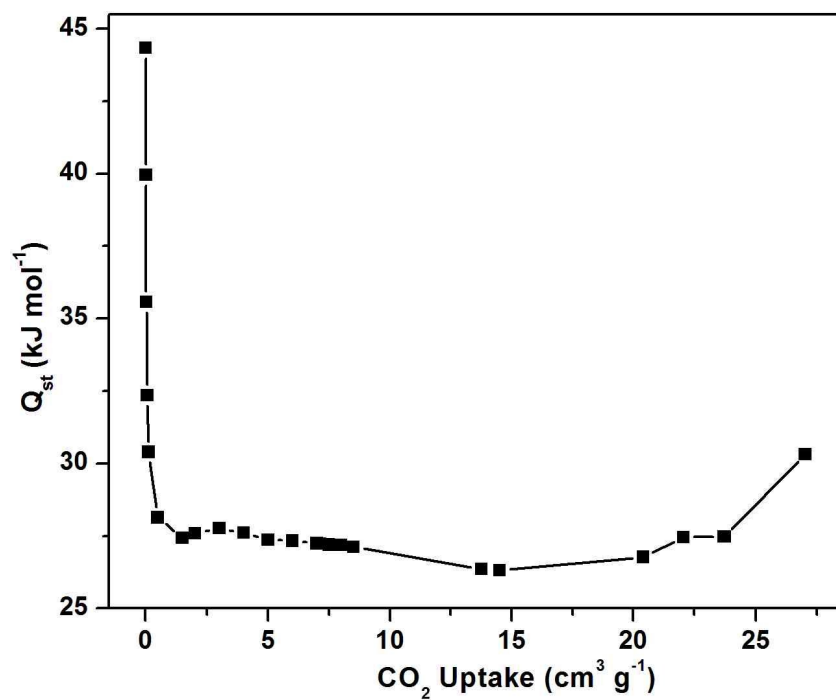

Figure S6. Calculated isosteric heats of adsorption as a function of CO<sub>2</sub> uptake for **1'**.

**Table S1.** Lattice parameters of as-synthesized **1** having cubic unit cell. The values are compared with those of the formerly reported, isostructural, parent and functionalized Zr(IV) and Ce(IV)-based UiO-66 compounds.

| Compound                                     | $a$ (Å)    | $V$ (Å <sup>3</sup> ) |
|----------------------------------------------|------------|-----------------------|
| <b>1</b>                                     | 21.427(7)  | 9837.7(13)            |
| Ce-UiO-66 <sup>[1]</sup>                     | 21.4727(3) | 9900.6(4)             |
| Ce-UiO-66-F <sup>[1]</sup>                   | 21.5241(8) | -                     |
| Ce-UiO-66-CH <sub>3</sub> <sup>[1]</sup>     | 21.4842(2) | -                     |
| Ce-UiO-66-Cl <sup>[1]</sup>                  | 21.4904(2) | -                     |
| Ce-UiO-66-NO <sub>2</sub> <sup>[1]</sup>     | 21.5194(2) | -                     |
| Ce-UiO-66-COOH <sup>[1]</sup>                | 21.4718(7) | -                     |
| Zr-UiO-66 <sup>[2]</sup>                     | 20.7004(2) | 8870.3(2)             |
| Zr-UiO-66-SO <sub>3</sub> H <sup>[3]</sup>   | 20.824(1)  | 9029.8(6)             |
| Zr-UiO-66-COOH <sup>[3]</sup>                | 20.8202(3) | 9025.1(1)             |
| Zr-UiO-66-I <sup>[3]</sup>                   | 20.8076(5) | 9008.8(2)             |
| Zr-UiO-66-CF <sub>3</sub> <sup>[4]</sup>     | 20.43(5)   | 8524.5(34)            |
| Zr-UiO-66-(COOH) <sub>2</sub> <sup>[4]</sup> | 20.54(6)   | 8662.9(27)            |
| Zr-UiO-66-F <sub>2</sub> <sup>[4]</sup>      | 20.33(5)   | 8401.9(32)            |
| Zr-UiO-66-Cl <sub>2</sub> <sup>[4]</sup>     | 20.27(13)  | 8325.7(48)            |
| Zr-UiO-66-Br <sub>2</sub> <sup>[4]</sup>     | 20.23(3)   | 8276.5(36)            |

**Table S2.** Oxidation of styrene using various oxidants in the presence of **1**'.

| S.No. | Substrate | Oxidant        | T (°C) | Time (h) | Conv. (%) | Selectivity (%) |          |        |
|-------|-----------|----------------|--------|----------|-----------|-----------------|----------|--------|
|       |           |                |        |          |           | <b>2</b>        | <b>3</b> | Others |
| 1     | Styrene   | TBHP in decane | 40     | 1        | 3.5       | 5               | 80       | 15     |
| 2     | Styrene   | TBHP in decane | 40     | 3        | 6.3       | 6               | 81       | 13     |
| 3     | Styrene   | TBHP in decane | 40     | 5        | 10.1      | 6               | 74       | 20     |
| 4     | Styrene   | TBHP in decane | 40     | 7        | 12.6      | 7               | 72       | 21     |
| 5     | Styrene   | TBHP in decane | 70     | 1        | 17.2      | 37              | 47       | 16     |
| 6     | Styrene   | TBHP in decane | 70     | 3        | 31        | 35              | 44       | 21     |
| 7     | Styrene   | TBHP in decane | 70     | 5        | 48        | 32              | 45       | 23     |
| 8     | Styrene   | TBHP in        | 70     | 7        | 58.8      | 29              | 42       | 29     |

|    |         | decane        |    |   |    |    |    |    |
|----|---------|---------------|----|---|----|----|----|----|
| 9  | Styrene | TBHP in water | 70 | 1 | 15 | 16 | 68 | 16 |
| 10 | Styrene | TBHP in water | 70 | 3 | 29 | 21 | 61 | 18 |
| 11 | Styrene | TBHP in water | 70 | 6 | 62 | 19 | 50 | 31 |
| 12 | Styrene | TBHP in water | 70 | 9 | 72 | 17 | 44 | 39 |

Reaction conditions: styrene (1 mmol), oxidant (1 mmol), **1'** (20 mg), CH<sub>3</sub>CN (2 mL).

**Table S3.** Conversion of cyclohexene in the presence of **1'** using TBHP as oxidant.

| S.No. | Time (h) | Conv. (%) | Selectivity (%) |          |          |          |
|-------|----------|-----------|-----------------|----------|----------|----------|
|       |          |           | <b>4</b>        | <b>5</b> | <b>6</b> | <b>7</b> |
| 1     | 1        | 21        | 17              | 10       | 30       | 43       |
| 2     | 3        | 42        | 10              | 11       | 33       | 46       |
| 3     | 5        | 51        | 7               | 10       | 33       | 50       |
| 4     | 7        | 56        | 7               | 12       | 33       | 48       |

Reaction conditions: cyclohexene (1 mmol), TBHP in decane (1 mmol), **1'** (20 mg), CH<sub>3</sub>CN (2 mL), 70 °C.

#### References:

1. M. Lammert, M. T. Wharmby, S. Smolders, B. Bueken, A. Lieb, K. A. Lomachenko, D. De Vos and N. Stock, *Chem. Commun.*, 2015, **51**, 12578-12581.
2. M. Dan-Hardi, C. Serre, T. Frot, L. Rozes, G. Maurin, C. Sanchez and G. Ferey, *J. Am. Chem. Soc.*, 2009, **131**, 10857-10859.
3. S. Biswas, J. Zhang, Z. Li, Y.-Y. Liu, M. Grzywa, L. Sun, D. Volkmer and P. Van Der Voort, *Dalton Trans.*, 2013, **42**, 4730-4737.
4. S. Biswas and P. Van Der Voort, *Eur. J. Inorg. Chem.*, 2013, **2013**, 2154-2160.
